# Supplementary material
Source: PubMed Central journal article supplement (PMC341799)
Supplement: pnas_0304170101_4.pdf [file pnas_0304170101_4.pdf]

a

1 GGGCCCGGAGCGACTGTCTTTGGGTAAACTGGAACACAATGATATAAGTTGGTTATTAATCTCTTGCAATTTTTCTTTAAATTTCTTCTTGTATA 100  
||  
M T V D P I Q D L R N I C L Q I L Q  
101 ACTTGTGCATTACTATTCAAATCTTTAGACAAATCAATAATATGATGACAGTAGACCCAATACAAGATCTACGCAATATCTGTTTACAGATATTGCAA 200  
S V N S N T L L E E E T W D Y N T  
201 TCGGTTAATTCTAATACTCTATTGGAAGAAGAACATGGGATTACAACACGgtaagtttacgataatattatcatttcaaatattgagataagcactact 300  
L I N N I D L P K Q T R E A L R R S A S Q Y L L Y C O R K  
301 aacaccgacaataagTTGATCAACAACATAGATTTACCCAAACAGACTAGAGAAGCACTTCGCAGAAGTGCTTCTCAATACCTGCTGATTGTCAAAGAA 400  
N K T Y T T R K P L P A K A K L Q L V E T F S K K R Y L T R C E K  
401 AAAATAAACATATACAACACTAGGAAGCCTCTACCAGCAAAGGCCAAGCTACAATTAGTTGAAACATTTTCCAAGAAACGGTACCTGACTAGATGTGAAA 500  
H Q L A V Q C G I T T N Q V Q I W  
501 ACATCAGTTGGCGGTTCAATGTGGGATCACCACCAATCAAGTTCAAATTTGGgtagtgttttctaatttgagtgaaccaattcaacctctgtagtaata 600  
F A N R R K R S K D L N N R D \*  
601 ctaacttagaacatacagTTTGCAAATAGGCGCAAGAGATCGAAAGATCTAAACAATCGTGACTAGCTATAGTTCTCTTACTCTTTTATAGTTTTCTC 700  
701 CCCGTACAATTCAAATACAAAACAATCTTTAAATTTTCGCTTACTTTGCAATCCAACATATCTGCTTTTCCGAACAGTTTAAATTTTTCGAGTCTCTCGGTGT 800  
801 GGGTTTGTAATTATATAATGGCCCATCGCTCCTCAGCG 839  
| ^ ^ ^ ^ ^  
YZ junction (Ho site)

9996 GGGCCCGGAGCCAGTTTCTTTGGGTAAACTGGAACACAATGATATAAGTTGTTTATTAATCTCTTGCAATTTTTCTTTAAATTTCTTCTTATTATA 10095  
||  
M N V O E I H N I R E A C I T I L S G T K H N  
10096 TATAATAAGATAAAAAACAACAACAGAGTAATGAACGTTTCAGGAAATCCATAACATCAGAGAGGCTTGATCACTATTTTGTAGTGGCACCACAAACATAAT 10195  
S V L F E P C D K F D E V  
10196 TCTGTGTTATTCGAGCCGTGTGACAAATTTGATGAAGtagtgtatattttattgaaactcctccagacagctttcatctttactaactcaattacagGTC 10295  
I N S L D I D P D S K E T L R R S V S L L V G T R N H K R G C N I D  
10296 ATTAACAGTTTAGATATTGACCCTGATTCGAAGAAACACTTCGCAGAAGTGTTCCTTGCTAGTCGGAACCGAATCATAAAAGAGGATGAACATTG 10395  
K K T K D M L N K V Y E Q K Q Y L T K E E R E F V A K K C N L T P  
10396 ACAAGAAGACCAAGATATGCTCAACAAGGTATATGAACAGAAGCAATATCTAACAAGAAAGAGAGGGAATTCGTTGCTAAAAAGTGAACCTTAACGCC 10495  
L O V R V W F A N K R I R  
10496 ACTTCAGGTCAGAGTTTGGgtagtgaactcatcatatttgataatttaaccattggatccagtactaacaacatataaagTTTGCTAATAAGAGGATTA 10595  
N K N T K M \*  
10596 GAAATAAAAATACGAAAATGTAACACTGCCGATGGAGCTATTTTTTTTATTATAGTTTTAAAAATCAAAATATCAAATTTAGAACAAAAATATATCAA 10695  
10696 TAAAATATACTAATCAGTGTATCTCATTTCGCAACAGTTTAAATTTTTCGAGTGTCTCGGTGTGGGTTTGTAAATATATAATGGCCCAAGCGTCTC 10795  
| ^ ^ ^ ^ ^  
YZ junction (Ho site)
